# Supplementary material for: Validation of a constraint-based model of Pichia pastoris metabolism under data scarcity
Source: Springer Nature journal article supplement (doi:10.1186/1752-0509-4-115), 2010-08-17

**A** EMS: GLC + GOL, GLC + MET, GOL + MET => growth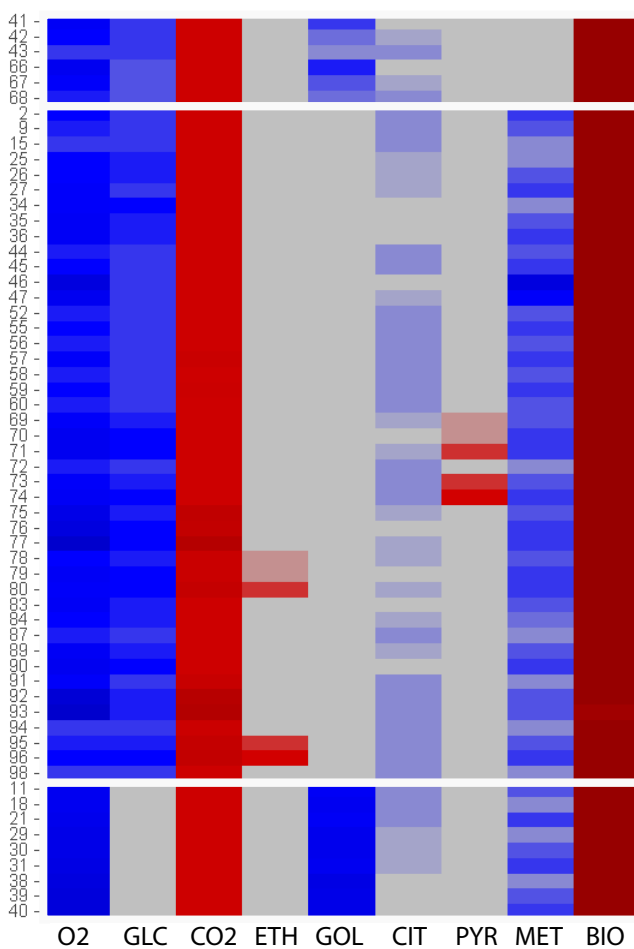**B** EMS: GLC or GLY or Methanol => growth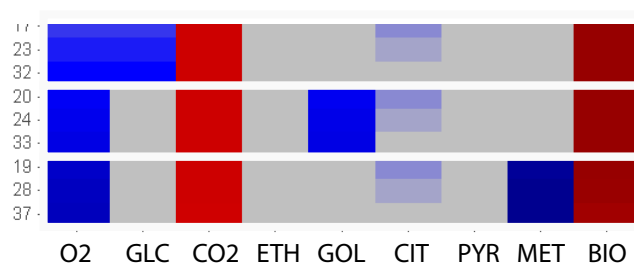**C** EMS: GLC + GLY + Methanol => growth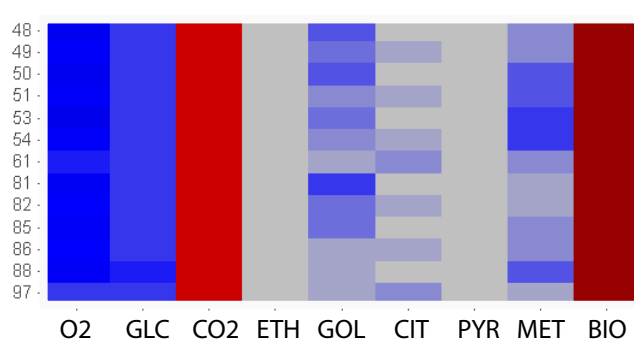**D** EMS: no growth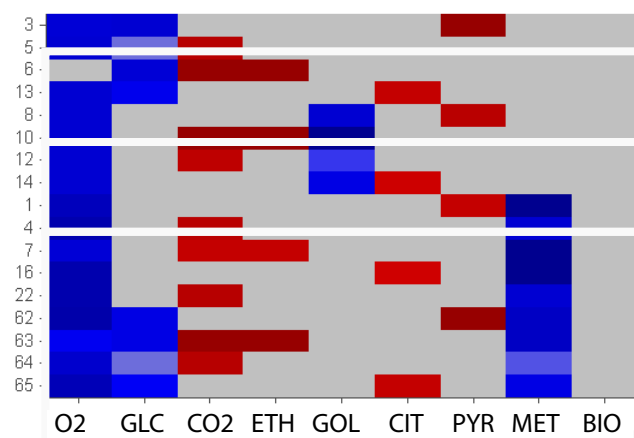

Supplement: 12918_2010_504_MOESM5_ESM.pdf [file 12918_2010_504_MOESM5_ESM.pdf]
