# Supplementary material for: Validation of a constraint-based model of Pichia pastoris metabolism under data scarcity
Source: Springer Nature journal article supplement (doi:10.1186/1752-0509-4-115), 2010-08-17

**A**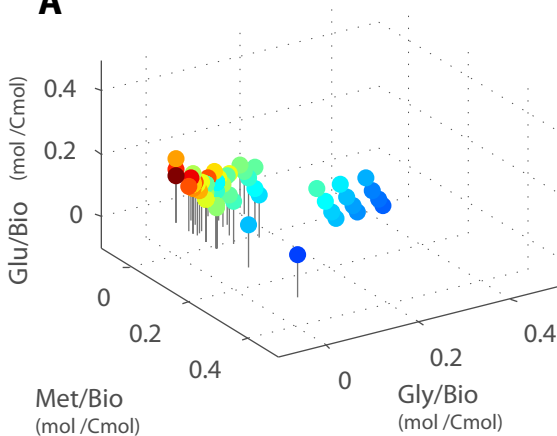**B**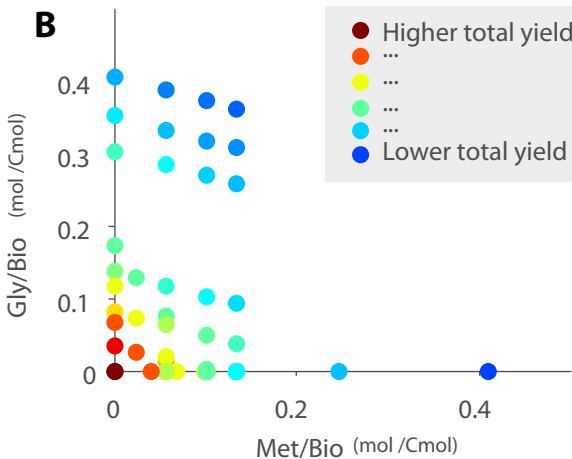

Supplement: 12918_2010_504_MOESM6_ESM.pdf [file 12918_2010_504_MOESM6_ESM.pdf]
